# Supplementary material for: The Long Non-Coding RNA HOXA-AS2 Promotes Proliferation of Glioma Stem Cells and Modulates Their Inflammation Pathway Mainly through Post-Transcriptional Regulation
Source: MDPI journal article supplement (doi:10.3390/ijms23094743), 2022-04-25
Supplement: s1 [file s1]

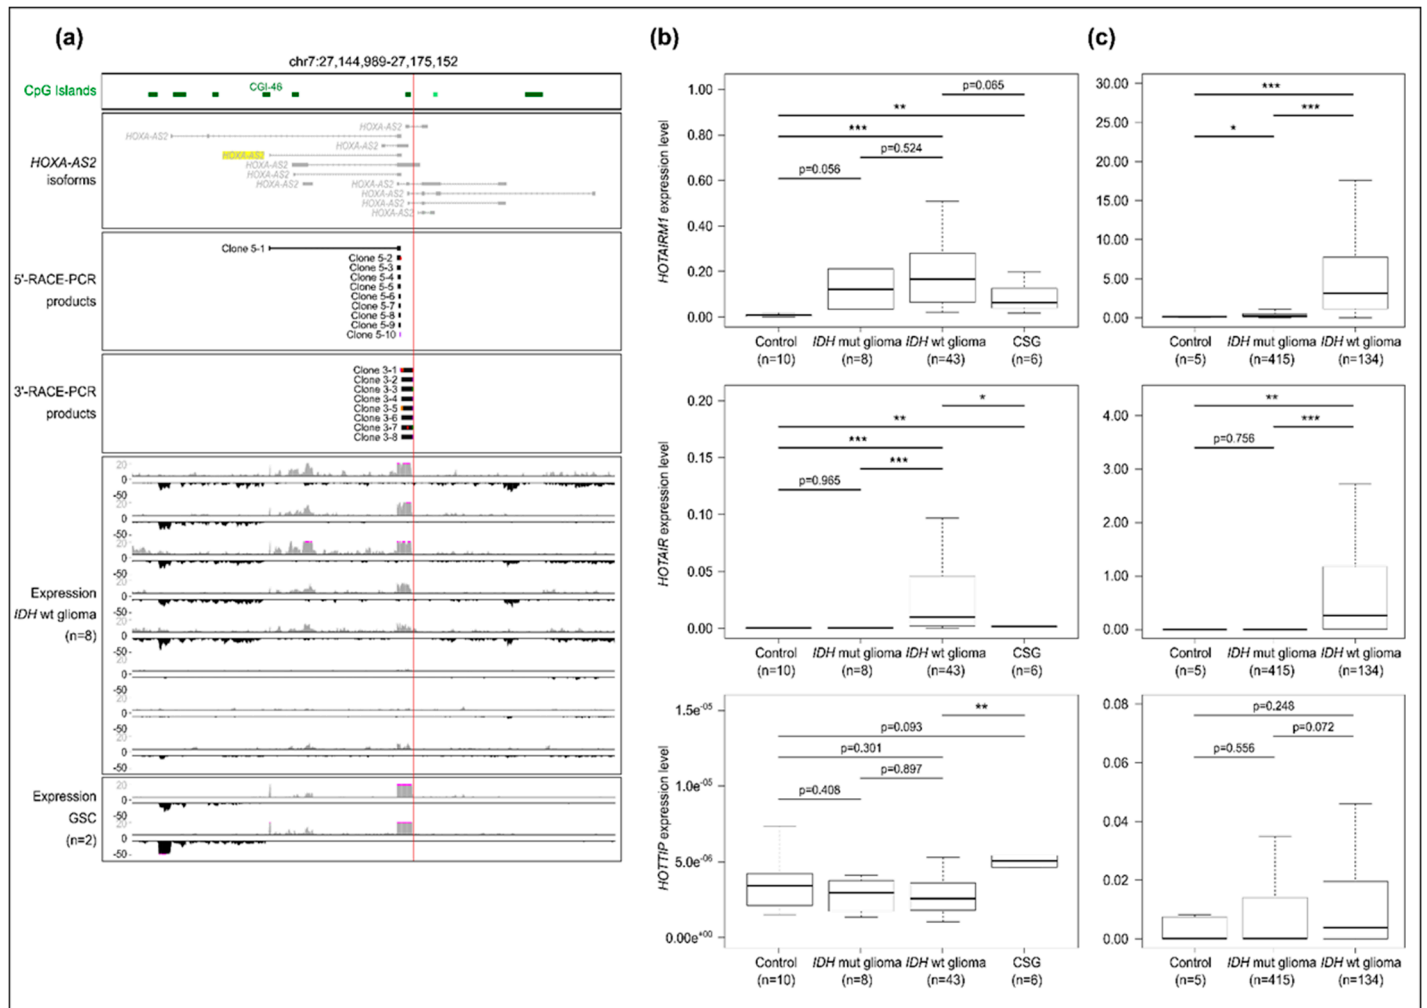

**Supp Figure 1: Expression status of *HOTAIRM1*, *HOTAIR* and *HOTTIP* in *IDHwt* glioma samples and GSC lines.**

**(a)** Genomic positions of the 5' and 3' RACE-PCR products obtained using an *IDHwt* glioma sample. Strand-oriented RNA-seq signals along the genomic region encompassing *HOXA-AS2* in *IDHwt* (n=8) glioma and Glioma Stem Cell (GSC) (n=2) samples are also shown. **(b)** and **(c)** Relative expression level of *HOTAIRM1* (upper panel), *HOTAIR* (middle panel) and *HOTTIP* (lower panel) in control, *IDHmut* and *IDHwt* glioma and CSG samples from our cohort analyzed by microfluidic-based RT-qPCR **(b)** and from the TCGA cohort, analyzed by RNA-seq **(c)**. In **(b)** Values are the fold change relative to the geometrical mean of expression of the housekeeping genes *PPIA*, *TBP* and *HPRT1*. \*P < 0.05, \*\*P < 0.01, \*\*\*P < 0.001 (Mann-Whitney U-test).

(a)

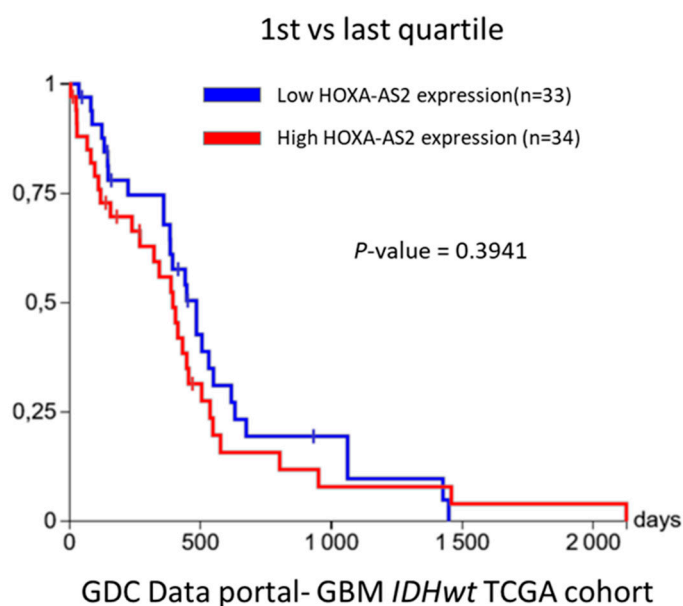

(b)

Supp Figure 2: Kaplan-Meier survival curves of IDHwt Supp

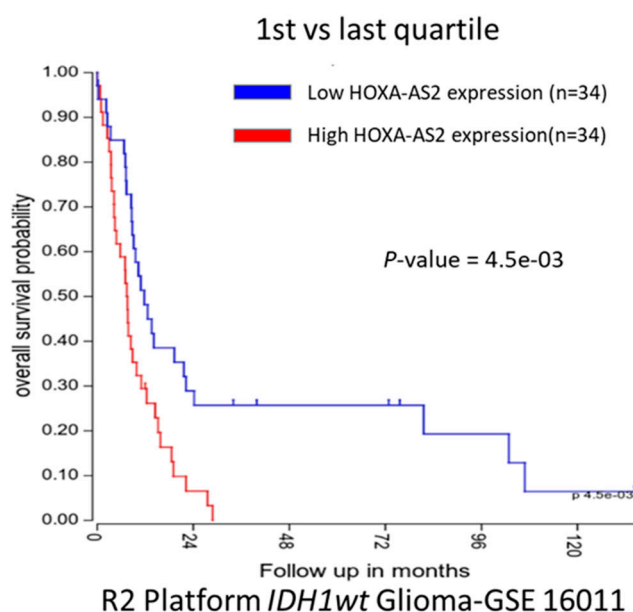

**Supp Figure 2: Kaplan-Meier survival curves of IDHwt glioma according to *HOXA-AS2* mRNA expression**

(a) Kaplan-Meier survival curves of IDHwt patients of the TCGA cohort from the GDC data portal (<https://portal.gdc.cancer.gov/>). *HOXA-AS2* expression was assessed by RNA-seq. Comparison is shown for the 1<sup>st</sup> vs the last expression quartile. (b) Kaplan-Meier survival curves of *IDH1wt* patients in GSE16011 (Gravendeel *et al.* 2009) from the R2 Platform (<https://r2.amc.nl>) of the TCGA cohort from the GDC data portal (<https://portal.gdc.cancer.gov/>). *HOXA-AS2* expression was assessed with the Affymetrix U133 Plus 2.0 array, probe 230080\_at. Comparison is shown for the 1<sup>st</sup> vs the last expression quartile

Reference :

Gravendeel, L.A.; Kouwenhoven, M.C.; Gevaert, O.; de Rooij, J.J.; Stubbs, A.P.; Duijm, J.E.; Daemen, A.; Bleeker, F.E.; Bralten, L.B.; Kloosterhof, N.K.; De Moor, B.; Eilers, P.H.; van der Spek, P.J.; Kros, J.M.; Sillevs Smitt, P.A.; van den Bent, M.J.; French, P.J. Intrinsic gene expression profiles of gliomas are a better predictor of survival than histology. *Cancer Res.* **2009**, *69*, 9065-9072.

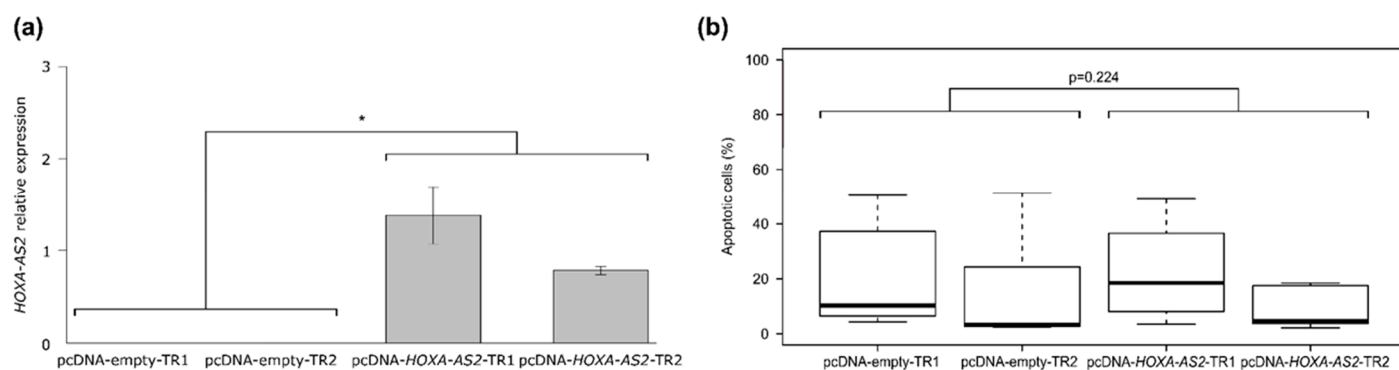

### Supp Figure 3: *HOXA-AS2* expression in H9-NSC lines

**(a)** Relative expression level of *HOXA-AS2* in H9-NSCs transfected with empty vector (n=2) and with a *HOXA-AS2* containing plasmid, analyzed by RT-qPCR. Values are the fold change relative to the geometrical mean of expression of the housekeeping genes *PPIA*, *TBP* and *HPRT1*. **(b)** Apoptosis quantification (n=5) in the two *HOXA-AS2*-expressing H9-NSC lines and their respective H9-NSC control line. TR1 and TR2 refer to the two independent transfection experiments. \*P < 0.05 (Mann-Whitney U-test).

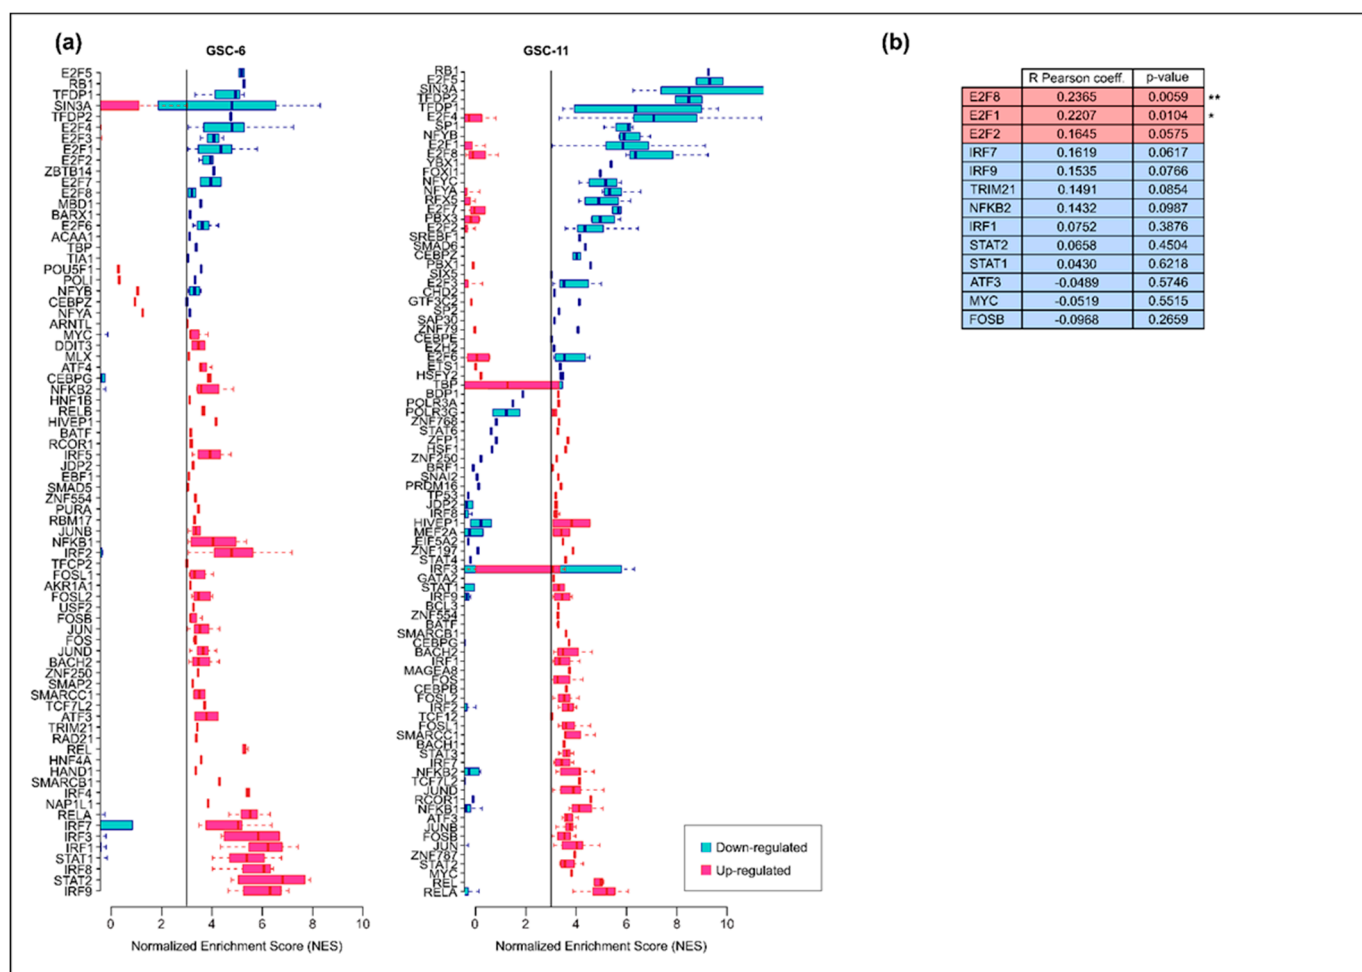

**Supp Figure 4: Transcription factor motif enrichment at the promoter of up- and down-regulated genes following *HOXA-AS2* silencing in GSG-6 and GSC-11 cells**

**(a)** Transcription factor motif enrichment at the promoter (defined as the area covering -1 kbp of RefSeq TSS) of up- and down-regulated genes following *HOXA-AS2* silencing in GSG-6 and GSC-11 cells, calculated using *i-cis* Target and represented as normalized enrichment score (NES). When a transcription factor harbors several binding motifs, data are presented as a box plot. **(b)** Correlation between *HOXA-AS2* expression and the transcription factors identified in Figure 5C, established using publicly available RNA-seq data from 134 *IDHwt* samples (TCGA cohort). \*\* $P < 0.01$ , \*\*\* $P < 0.001$  (Mann-Whitney *U*-test).

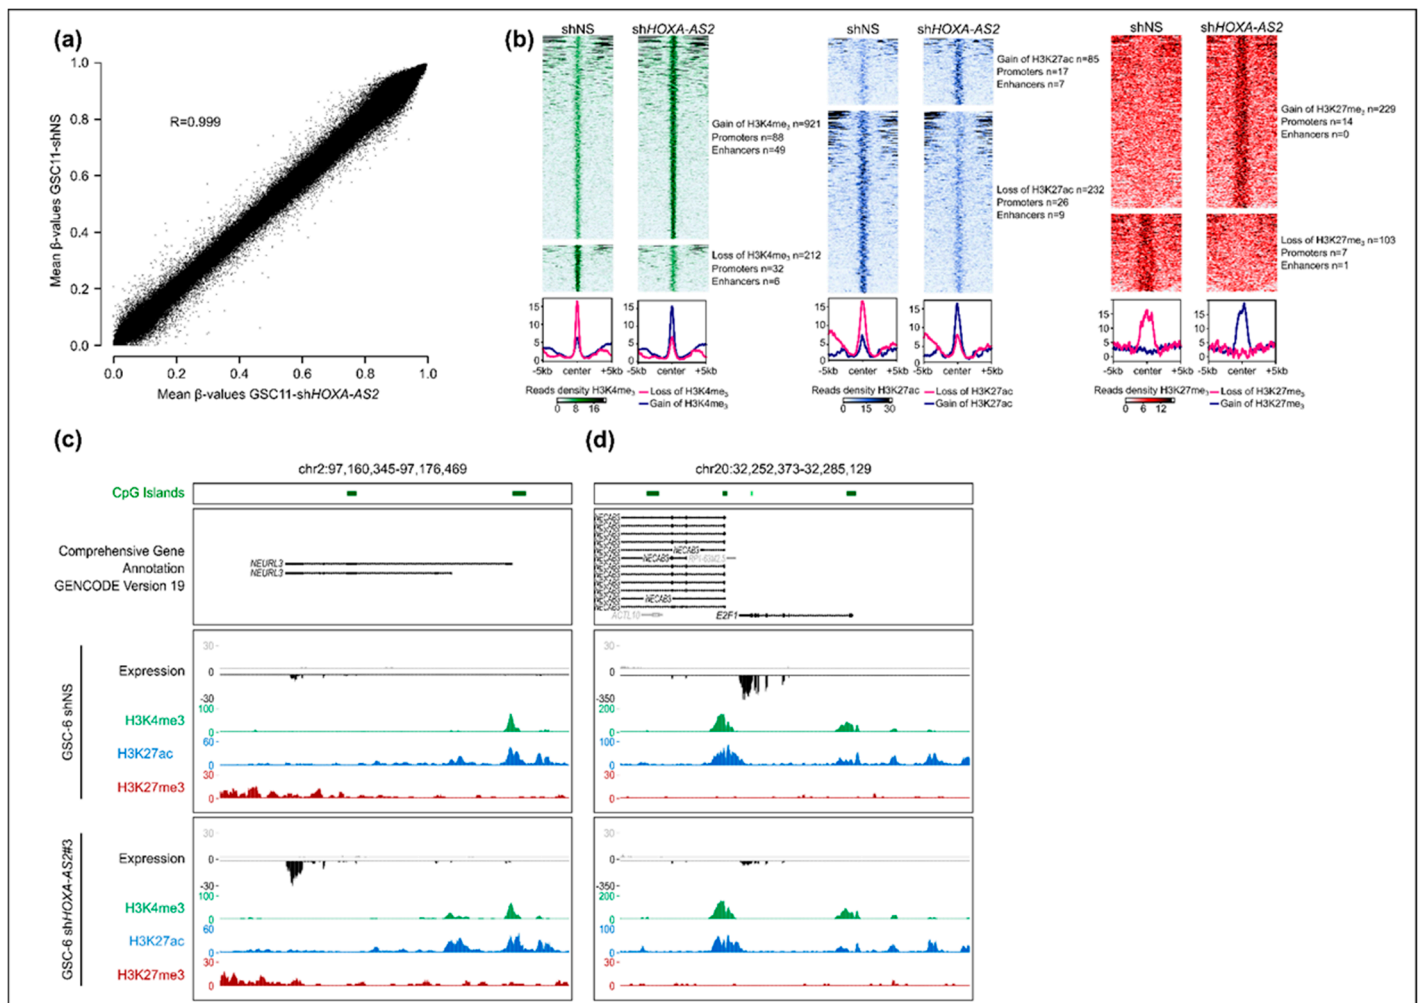

## Supp figure 5: Chromatin pattern at deregulated genes following *HOXA-AS2* silencing in GSC-6 cells

**(a)** Scatter plots to correlate DNA methylation pattern in GSC-11 cells transduced with lentiviruses expressing shNS or sh-*HOXA-AS2* (n=4). **(b)** ChIP-seq read density data for H3K4me3 (green), H3K27ac (blue) and H3K27me3 (red) in control (shNS) and *HOXA-AS2*-silenced GSC-6 cells. Only regions ( $\pm 5$  kb window) with changes (FC > 2; FDR < 0.01) in the level of a given mark are shown. The mean ChIP-seq signal values are shown on the lower panels. **(c) and (d)** Genome Browser view at the *NEURL3* (c) and *E2F1* (d) loci to show H3K4me3, H3K27ac, H3K27me3 enrichment, and the strand oriented RNA-seq signal in GSC-6 cells transduced with shNS or shHOXA-AS2#3.
